# Supplementary material
Source: PubMed Central journal article supplement (PMC3338257)
Supplement: supp_111.137497_137497SI.pdf [file supp_111.137497_137497SI.pdf]

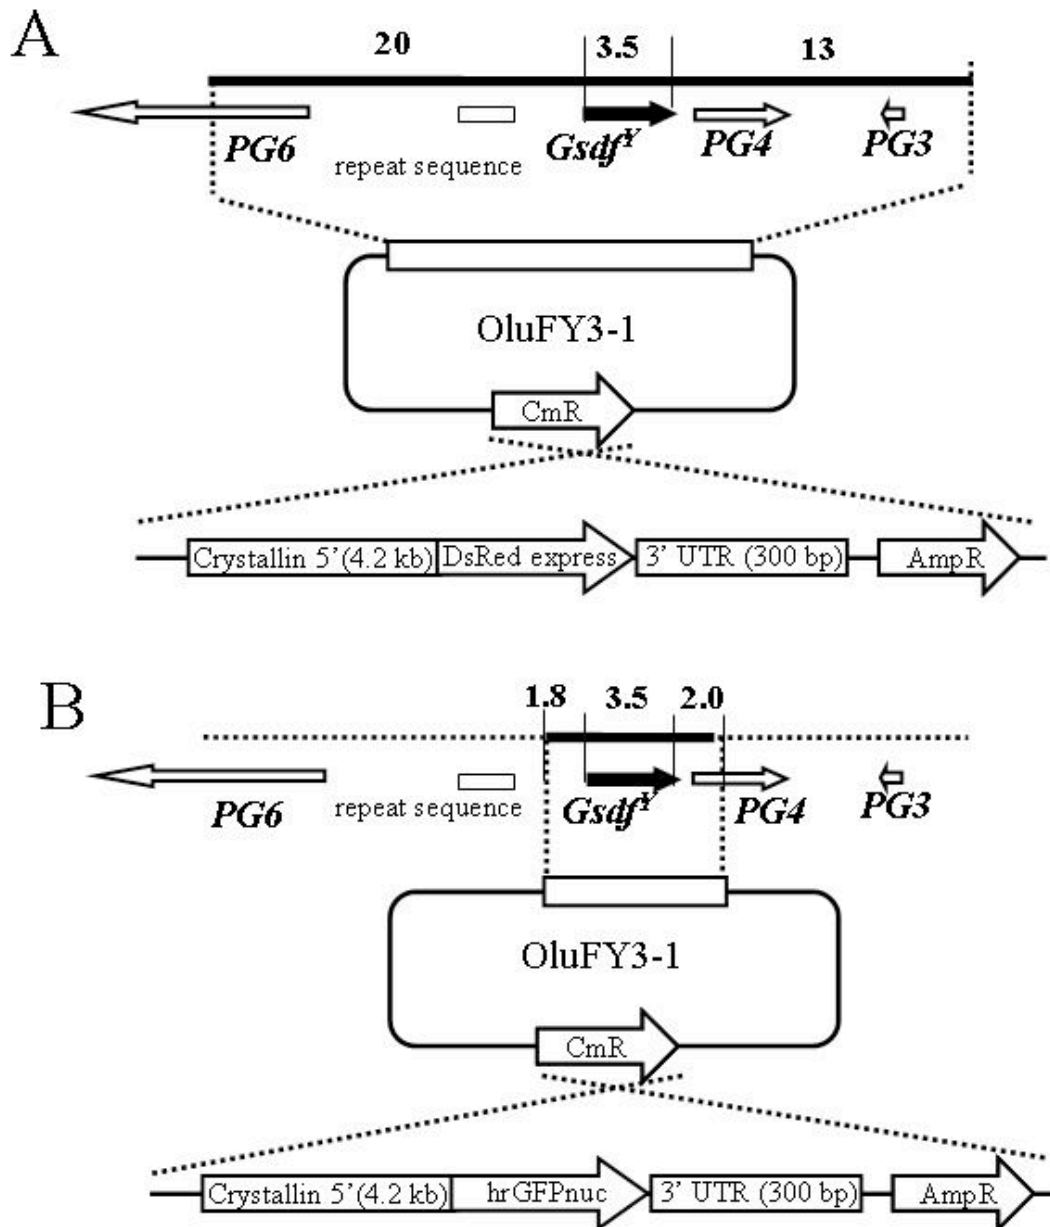

**Figure S1** Structures of transgenic constructs containing fluorescent markers. (A) Construct 1. This construct includes *Gsd<sup>fY</sup>*, *PG3* and *PG4*. Numbers above the thick bar indicate the length of the upstream, gene coding and downstream regions of the *Gsd<sup>fY</sup>* gene in the fosmid construct. A fragment encoding crystallin-RFP and an ampicillin resistance gene was integrated into the ORF of the chloramphenicol resistance gene. (B) Construct 2. This construct includes only *Gsd<sup>fY</sup>*. Numbers above the thick bar indicate the length of the upstream, gene coding and downstream regions of the *Gsd<sup>fY</sup>* gene. A fragment encoding crystallin-GFP and an ampicillin resistance gene was integrated into the ORF of the chloramphenicol resistance gene.

**Table S1 Sequences of primers**

| method           | name      | primer (5'-3')            |
|------------------|-----------|---------------------------|
| genotypic sexing | OluX2-8f  | AAGTGAACAGATGAATTA AAAATA |
|                  | OluX2-8r  | GTTCTTGAGGAACTACGTCC      |
|                  | OluX2-25f | CTGCCTGAGGCAAATGATGAA     |
|                  | OluX2-25r | TTTTGACAGGTTGGATCTGT      |
|                  | OluX3-34f | ACGGTGTTGCCGTTTCTCATTTT   |
|                  | OluX3-34r | CGTACCTTCTGGGGTCTCATTT    |
|                  | OluX4-6f  | TAATTAACGTGGGTGCATGTGG    |
|                  | OluX4-6r  | GGCCATGTTCAAACATTGT       |
| RT-PCR           | OluPG1f   | CCAAGGAAAAGCGTACAGGA      |
|                  | OluPG1r   | ATTCCGACAGTTCAGGTTGC      |
|                  | OluPG2f   | CACCCTATCGGAGAAGTTGG      |
|                  | OluPG2r   | TGGAAACGTGTGGA ACTCTG     |
|                  | OluPG3f   | CCATCCGTTGGTCAAGA         |
|                  | OluPG3r   | AAGCGCAGTTCAGAGTCCAT      |
|                  | OluPG4f   | TCCATGAAACTGCCAACTGA      |
|                  | OluPG4r   | GTTCCGATTGTCGGTAGAT       |
|                  | OluPG5f   | TGGAAACTTG TGGGGGAAT      |
|                  | OluPG5r   | GCAATCCCTCGGATCAAACAG     |
|                  | OluPG6f   | AGCCACAGTGATCAACGACA      |
|                  | OluPG6r   | GGAGGCGGAAAATATTGTGA      |
|                  | OluPG7f   | GTGTGAAATCCCTGCCAAAT      |
|                  | OluPG7r   | CGCAGCAGCTCTTTAAATCC      |
|                  | OluPG8f   | ATGACACGGAGATCCTACGC      |
|                  | OluPG8r   | TTCCACCATGGTCACATTG       |
|                  | OluPG9f   | GCTGAAGCAAATCCTCGTC       |
|                  | OluPG9r   | TGCTGGCATCAATGATCTGT      |
|                  | B-actin3b | CMGTCAGGATCTTCATSAGG      |
|                  | B-actin4  | CACACCTTCTACAATGAGCTGA    |

---

|                  |                  |                                    |
|------------------|------------------|------------------------------------|
|                  | qGsdFY_F         | TCGAATAGAATGAAATCTGACCACTCT        |
| real-time PCR    | qGsdFY_R         | GGTAAACCCAGGTTGGTCAAAT             |
|                  | qGsdFX_F         | TCGAATAGAATGAAATCTGACCACTTC        |
|                  | GsdFX_R          | GGTAAACCCAGGTTGGTCAAAG             |
| Luciferase assay | Luc In-fusion 1f | TAGGTACCTTAGGCAAGGCCCTTAACGCTAC    |
|                  | Luc In-fusion 1r | AACAAGCTTCAATGAGTGCCAAAGACATGGTGGA |

---
