# Supplementary material
Source: PubMed Central journal article supplement (PMC3338257)
Supplement: supp_111.137497_FigureS1.pdf [file supp_111.137497_FigureS1.pdf]

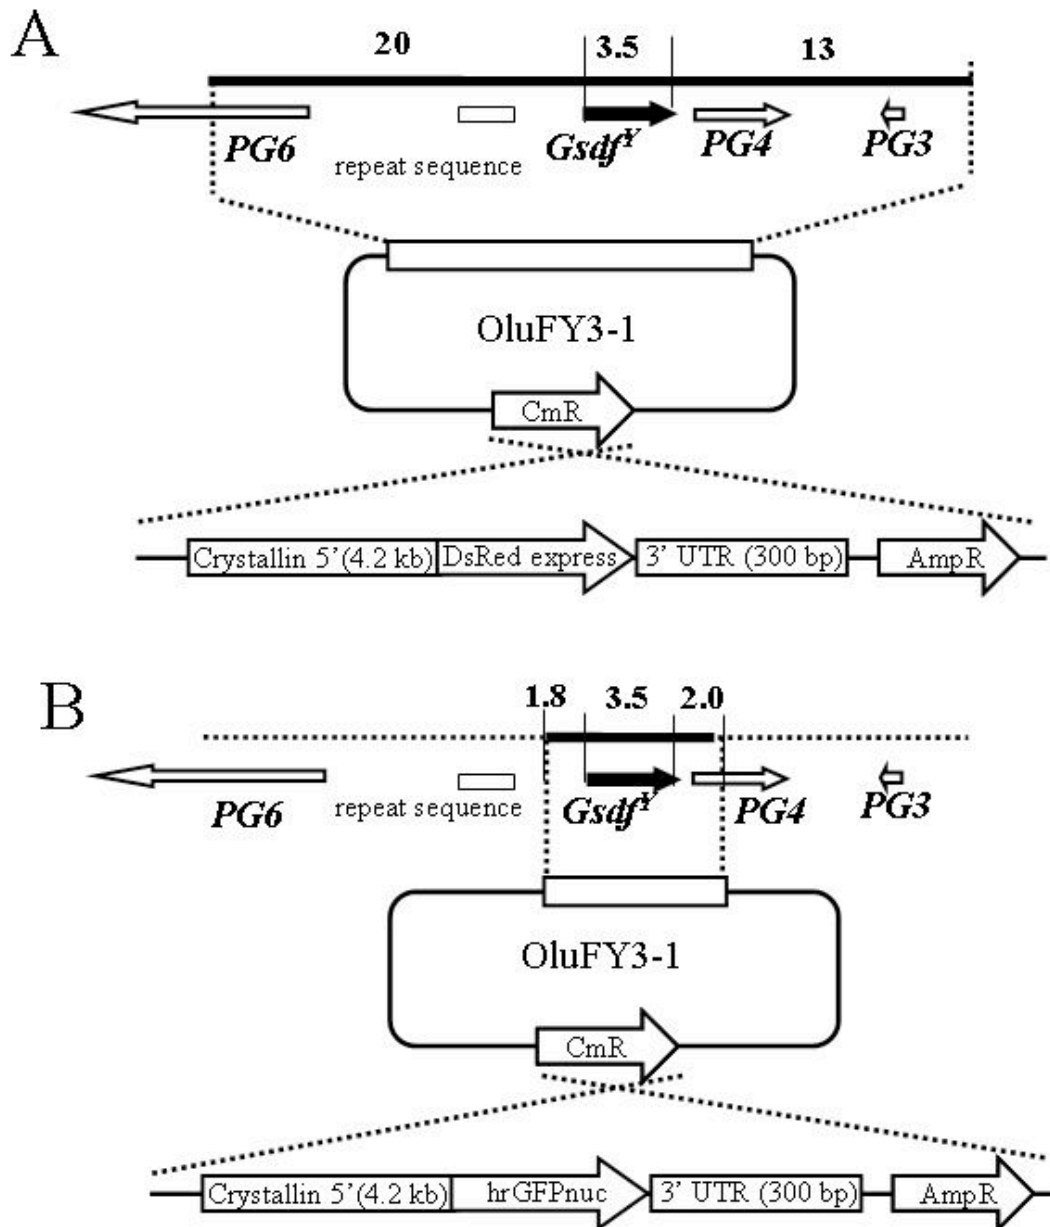

**Figure S1** Structures of transgenic constructs containing fluorescent markers. (A) Construct 1. This construct includes *Gsd<sup>fY</sup>*, *PG3* and *PG4*. Numbers above the thick bar indicate the length of the upstream, gene coding and downstream regions of the *Gsd<sup>fY</sup>* gene in the fosmid construct. A fragment encoding crystallin-RFP and an ampicillin resistance gene was integrated into the ORF of the chloramphenicol resistance gene. (B) Construct 2. This construct includes only *Gsd<sup>fY</sup>*. Numbers above the thick bar indicate the length of the upstream, gene coding and downstream regions of the *Gsd<sup>fY</sup>* gene. A fragment encoding crystallin-GFP and an ampicillin resistance gene was integrated into the ORF of the chloramphenicol resistance gene.
